# Supplementary material for: Selective and sensitive detection of picric acid based on a water-soluble fluorescent probe
Source: Royal Society of Chemistry journal article supplement (doi:10.1039/c6ra04080b), 2016-01-01
Supplement: c6ra04080b1.pdf [file c6ra04080b1.pdf]

Supplementary information for

## Selective and Sensitive Detection of Picric Acid Based on a Water-Soluble Fluorescent Probe

**Materials.** All chemicals were purchased from Beijing chem. Reagents Co. (Beijing, China), Aladdin, Alfa Aesar, and Sigma-Aldrich and were used as received. Cationic pyrene derivative (PyOEA) was synthesized and purified as follows.

### Synthesis of PyOEA

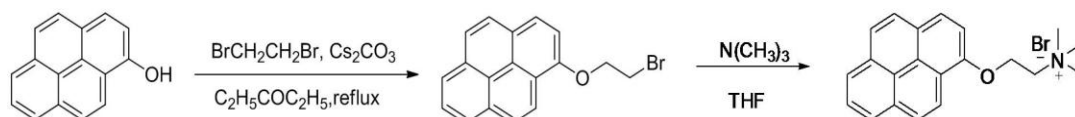

**1-(2-bromoethoxy)pyrene (PyOEBR)** To an acetone solution (35 mL) of 1-hydroxypyrene (2.18 g, 10.0 mmol),  $\text{Cs}_2\text{CO}_3$  (6.5 g, 19.9 mmol) and 1,2-dibromoethane (7.48 g, 39.8 mmol) was added and the action was refluxed for 4 hours. The reaction mixture was cooled to room temperature and extracted with dichloromethane. The organic layer was dried ( $\text{MgSO}_4$ ), filtered, and evaporated under reduced pressure. The crude product was purified by column chromatography (silica gel, petroleum ether/dibromoethane (2:1 v/v)) to give pale yellow solid (3.08 g, 95% yield).  $^1\text{H}$  NMR (500 MHz,  $\text{CDCl}_3$ )  $\delta$  8.49 (d,  $J = 9.0$  Hz, 1H), 8.14-8.05 (m, 4H), 7.99-7.95 (m, 2H), 7.91 (d,  $J = 9.0$  Hz, 1H), 7.49 (d,  $J = 8.5$  Hz, 1H), 4.62 (t,  $J = 6.0$  Hz, 2H), 3.85 (t,  $J = 6.0$  Hz, 2H).  $^{13}\text{C}$  NMR (125 MHz,  $\text{CDCl}_3$ )  $\delta$  151.99 (s), 131.64 (s), 131.61(s), 127.13 (s), 126.73 (s), 126.21 (s), 125.90 (s), 125.86 (s), 125.43 (s), 125.34 (s), 124.82 (s), 124.49 (s), 124.40 (s), 121.09 (s), 120.75 (s), 109.51 (s), 68.97 (s), 29.41 (s). HRMS: calcd [M] for  $\text{C}_{18}\text{H}_{13}\text{BrO}$  324.0150; found, 324.0149.

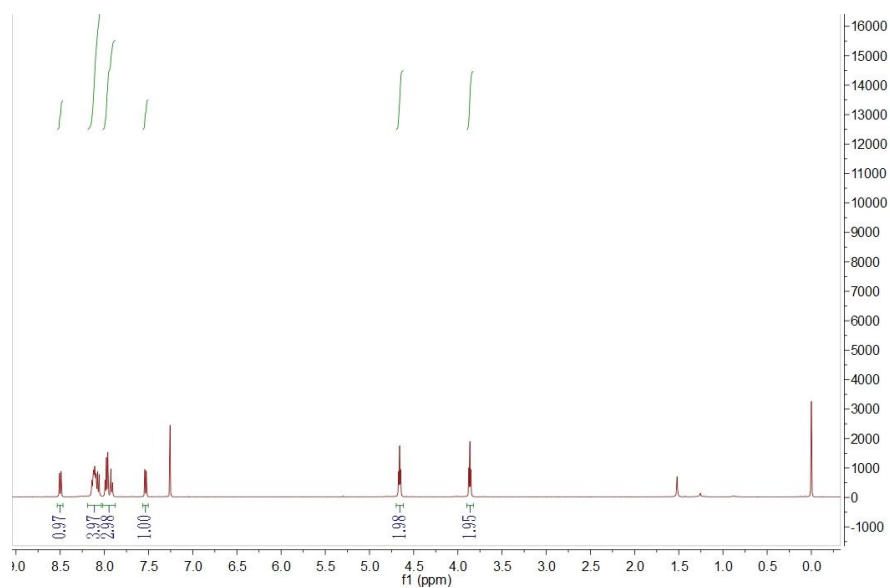

**Fig. S1**  $^1\text{H}$  NMR spectrum of PyOEBBr in  $\text{CDCl}_3$

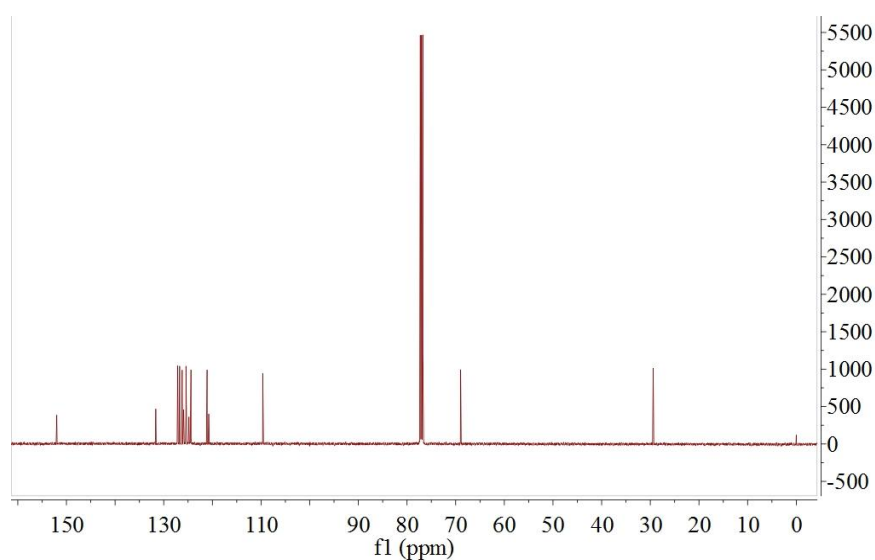

**Fig. S2**  $^{13}\text{C}$  NMR spectrum of PyOEBBr in  $\text{CDCl}_3$

***N,N,N*-trimethyl-2-(pyren-1-yloxy)ethanaminium bromide (PyOEA).** To a solution of PyOEBBr (1.62 g, 5.0 mmol) in THF, trimethylamine dissolved in EtOH (1.8 mL) was added and the mixture was stirred at 40 °C for 4 hours. The reaction mixture was cooled to room temperature and concentrated under reduced pressure. The crude product was poured into THF and filtered. After washing with THF, white solid of PyOEA was obtained (1.72g, 90% yield).  $^1\text{H}$  NMR (500 MHz, DMSO)  $\delta$  8.42 (d,  $J = 9.0$  Hz, 1H), 8.31 (d,  $J = 8.5$  Hz, 1H), 8.25-8.21 (m, 2H), 8.18 (d,  $J =$

9.5 Hz, 1H), 8.11 (d,  $J = 9.0$  Hz, 1H), 8.0 (m, 2H), 7.85 (d,  $J = 8.5$  Hz, 1H), 4.87 (m, 2H), 4.06 (t,  $J = 4.5$  Hz, 2H) 3.33 (s, 9H).  $^{13}\text{C}$  NMR (125 MHz, DMSO)  $\delta$  151.50 (s), 131.67 (s), 131.49 (s), 127.74 (s), 127.13 (s), 127.02 (s), 126.34 (s), 125.57 (s), 125.54 (s), 125.38 (s), 125.10 (s), 124.85 (s), 124.50 (s), 121.28 (s), 119.78 (s), 110.41 (s), 65.07 (s), 62.98 (s), 53.66 (s). HRMS: calcd [M-Br] for  $\text{C}_{21}\text{H}_{22}\text{NO}$ , 304.17; found, 304.1698.

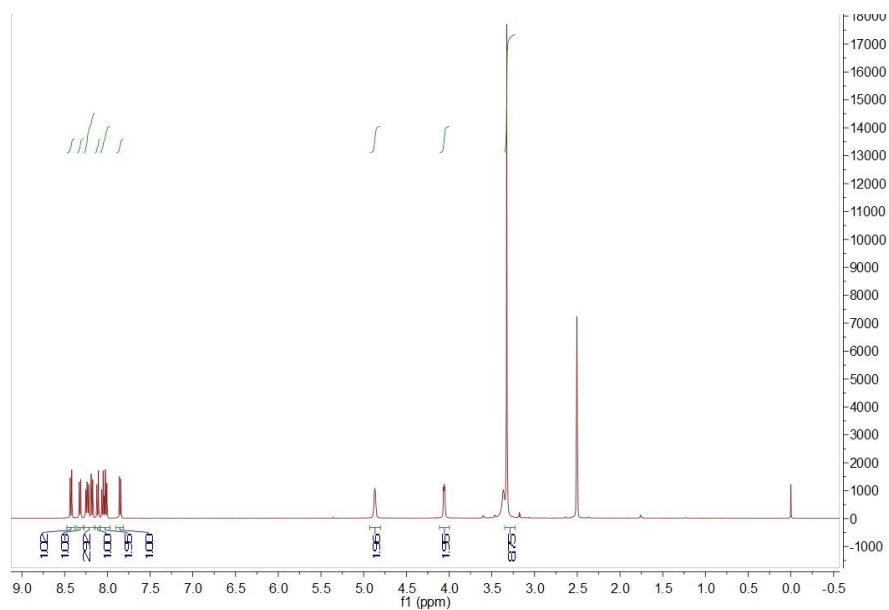

**Fig. S3**  $^1\text{H}$  NMR spectrum of PyOEA in  $\text{DMSO-}d_6$

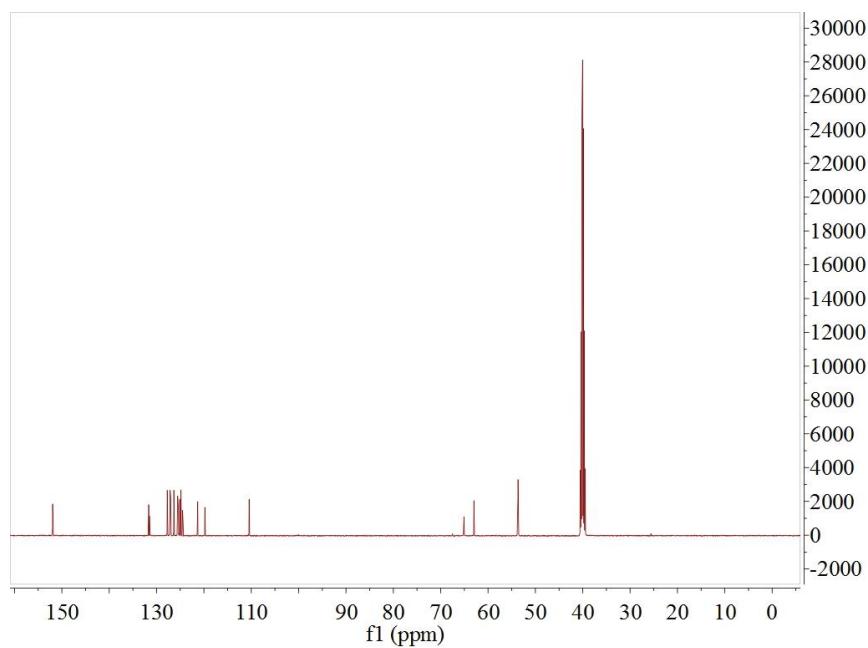

**Fig. S4**  $^{13}\text{C}$  NMR spectrum of PyOEA in  $\text{DMSO-}d_6$

**Sample preparation.** The stock solution of PyOEA and PA were prepared in pure water. The stock solutions of other organic interferents were initially dissolved in DMSO with a relatively high concentration. Stock solutions of PyOEA and PA were mixed directly to give the desired concentration and then measured with fluorescence spectrometer immediately.

**Spectral measurements.** Absorption and emission spectra were collected by using a HITACHI U-3900 UV-VIS spectrophotometer and a HORIBA Scientific Fluorolog®-3 spectrofluorometer, respectively.  $^1\text{H}$  NMR and  $^{13}\text{C}$  NMR spectra were carried out on a Bruker Avance III 500 spectrometer.

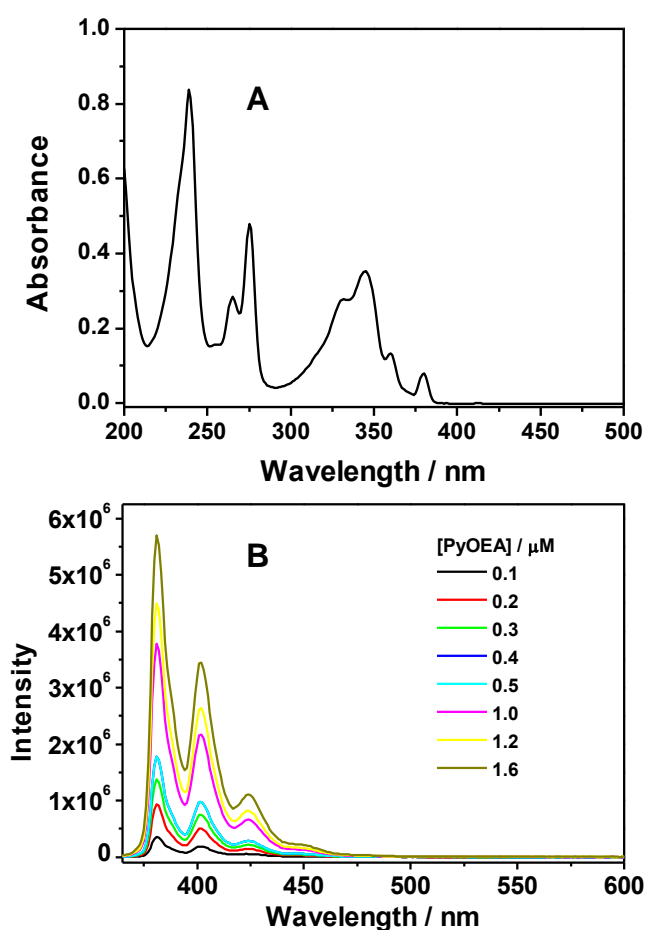

**Fig. S5** Absorption (A) and emission (B) spectra of PyOEA in 10 mM HEPES buffer (pH 7.4);  $\lambda_{\text{ex}}$  = 345 nm.

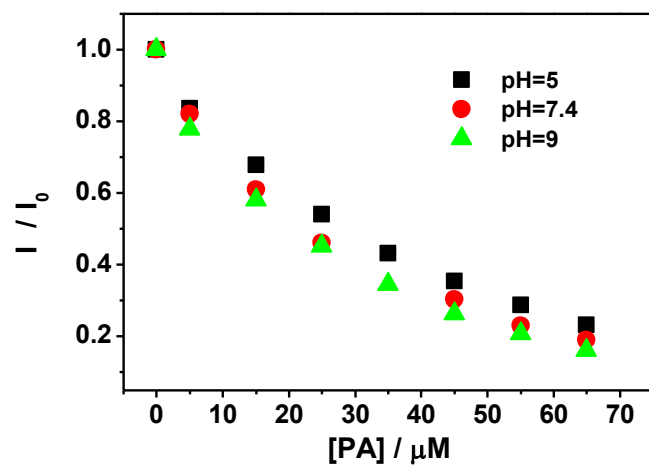

**Fig. S6** Plots of  $I/I_0$  vs  $[PA]$  in aqueous solution with different pH values as indicated.

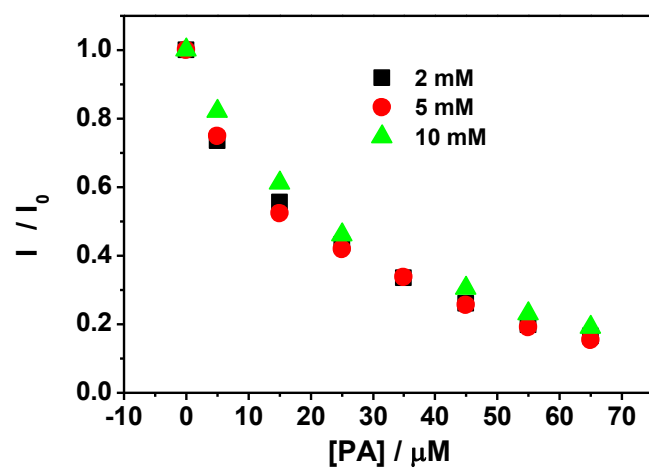

**Fig. S7** Plots of  $I/I_0$  vs.  $[PA]$  in HEPES buffer (pH 7.4) with different concentrations as indicated.

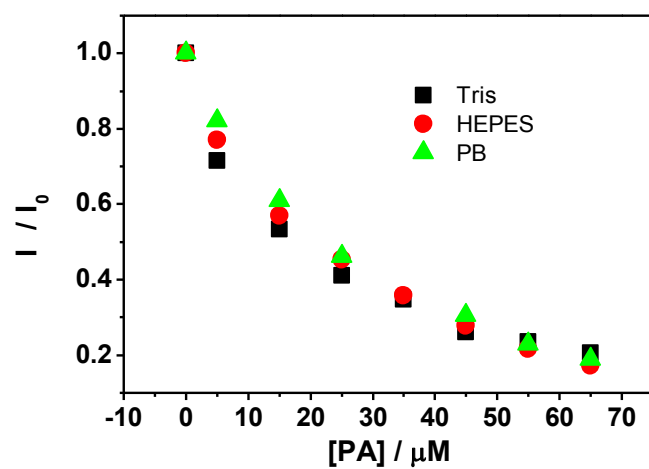

**Fig. S8** Plots of  $I/I_0$  vs  $[PA]$  in different buffer (10 mM, pH 7.4) as indicated.

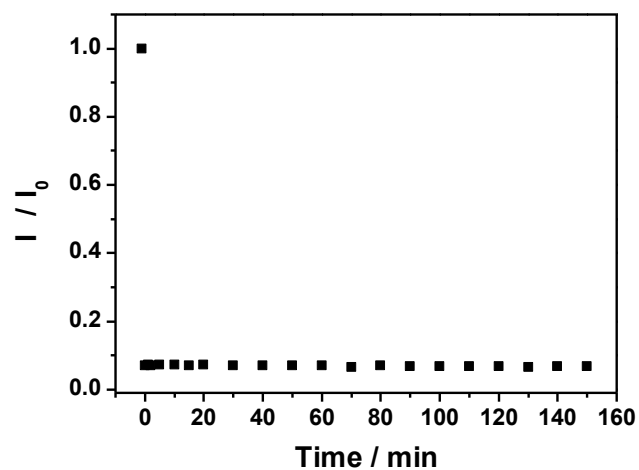

**Fig. S9** Relative intensity of  $I / I_0$  vs incubation time for the detection of PA in 10 mM HEPES buffer (pH 7.4).  $[PyOEA] = 2.0 \times 10^{-7}$  M;  $[PA] = 9.0 \times 10^{-5}$  M.

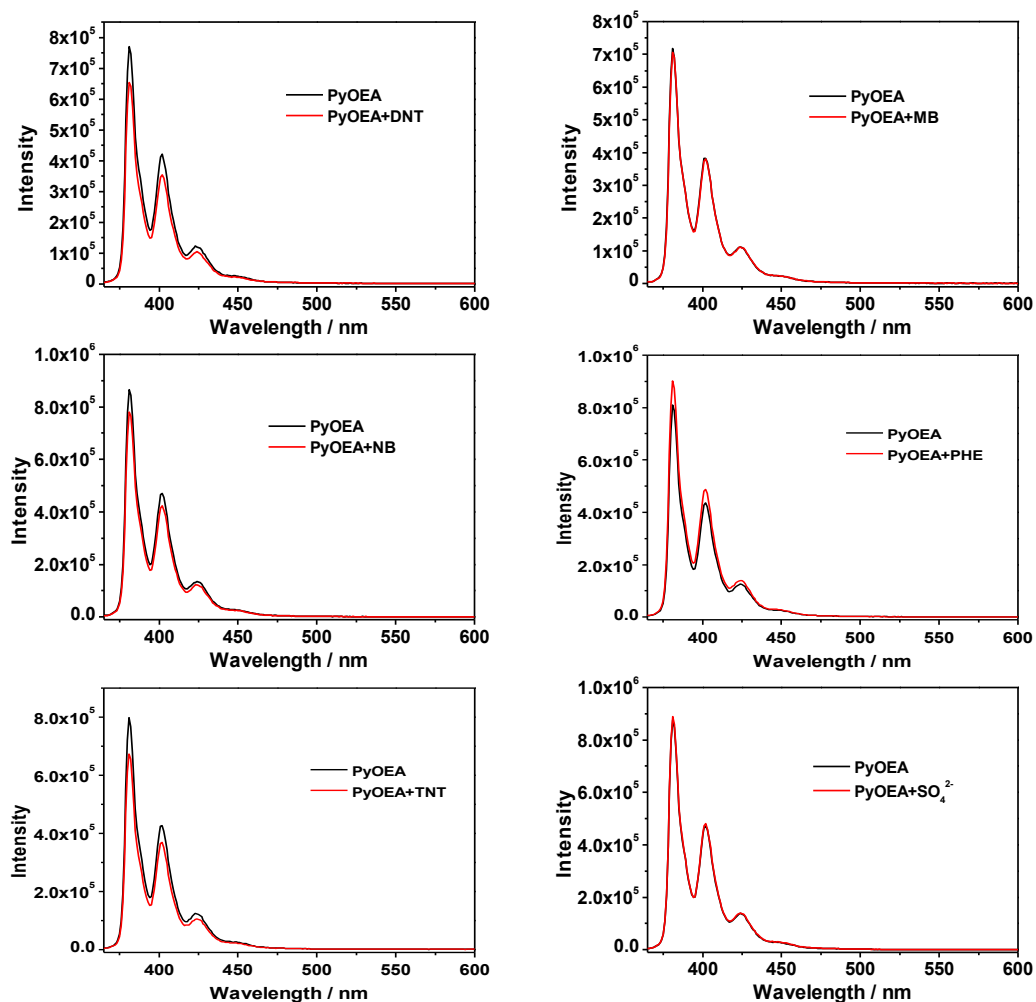

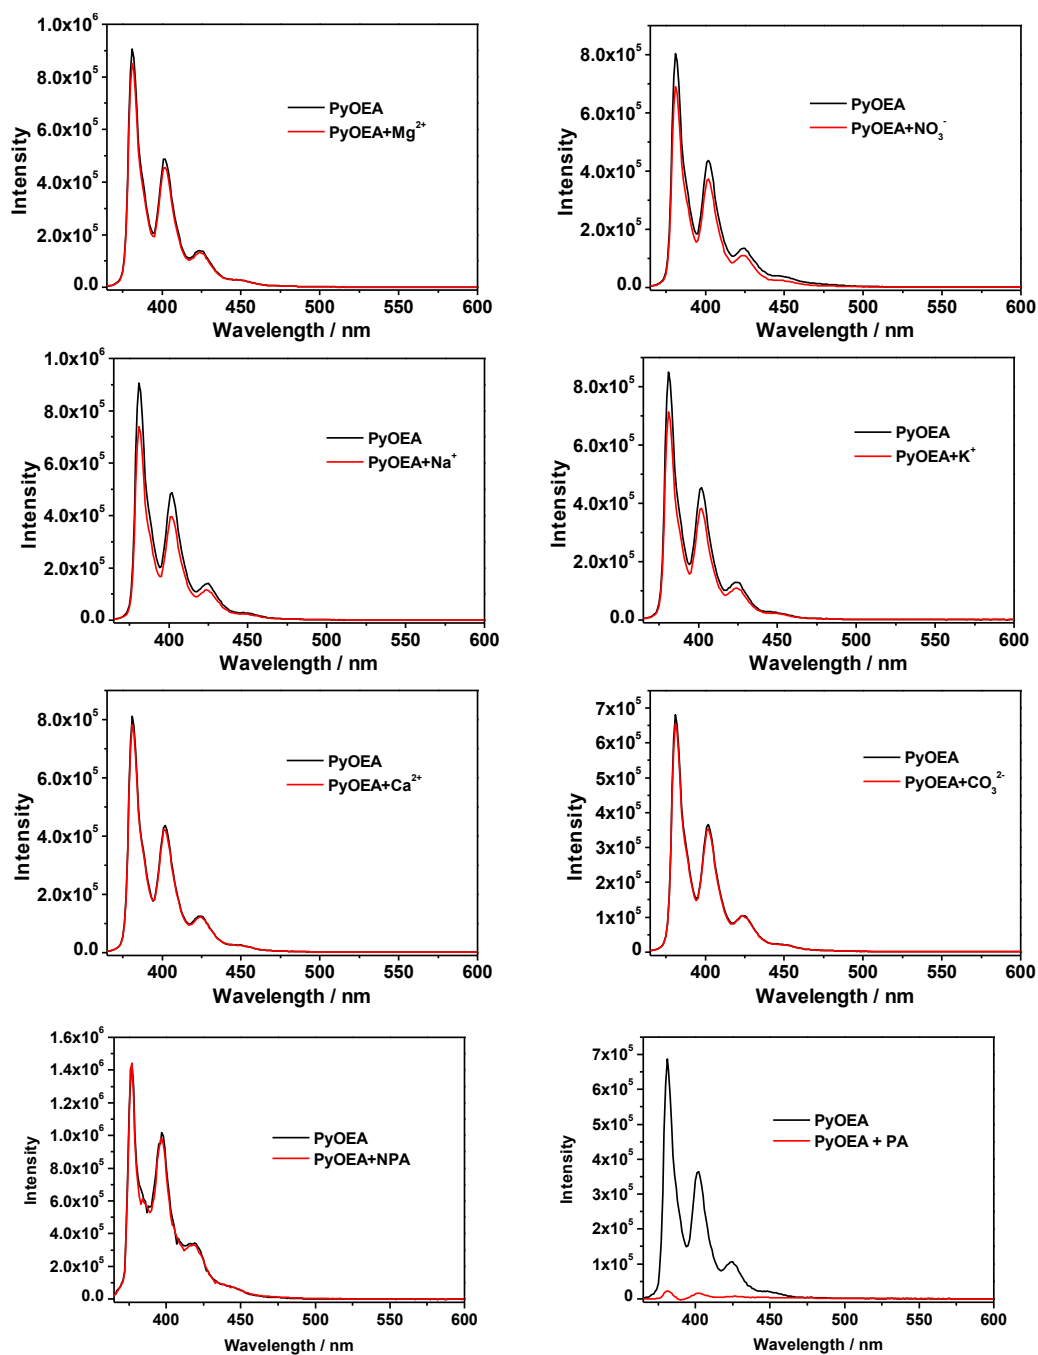

**Fig.S10** Emission spectra of PyOEA ( $2.0 \times 10^{-7}$  M) in the absence and presence of various analytes ( $9.0 \times 10^{-5}$  M) as indicated in 10 mM HEPES buffer (pH 7.4).  $\lambda_{\text{ex}} = 345$  nm.

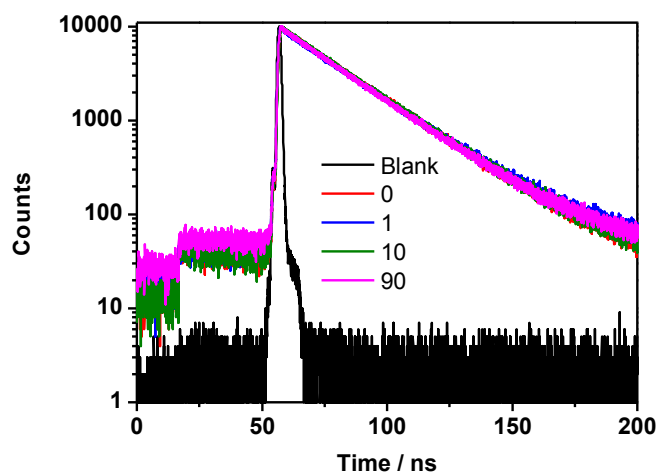

**Fig.S11** Time-resolved decay of PyOEA ( $2.0 \times 10^{-7}$  M) with different concentrations of PA ( $\mu\text{M}$ ) as indicated in 10 mM HEPES buffer (pH 7.4).

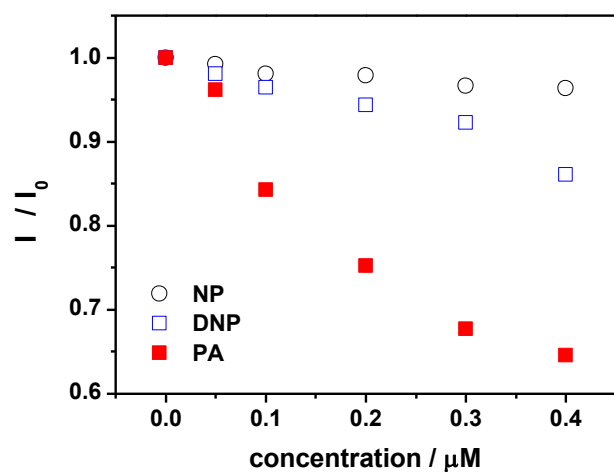

**Fig.S12** Relative fluorescence intensity of PyOEA ( $2.0 \times 10^{-7}$  M) in the presence of various amounts of PA, DNP, and NP as indicated in HEPES buffer (10 mM, pH 7.4).

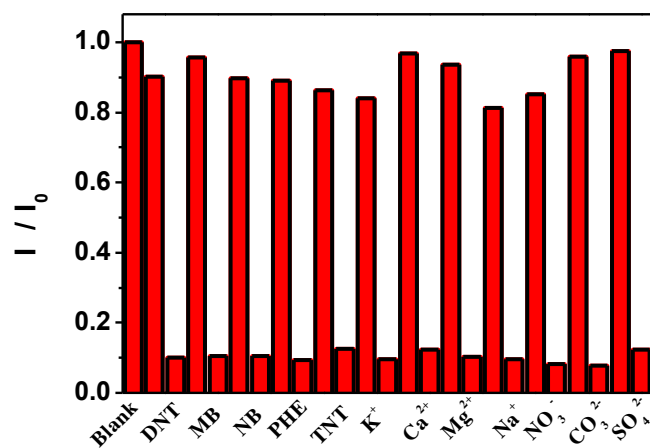



**Fig.S13** Relative fluorescence intensity of PyOEA/PA in the absence and presence of interferents in HEPES buffer (10 mM, pH 7.4). [PyOEA] =  $2.0 \times 10^{-7}$  M, [PA] = [interferents] =  $9.0 \times 10^{-5}$  M.

**Table S1.** Comparison of advantages and disadvantages of present work and previous methods

|                                                                           | LOD                    | Advantages                                                                                                              | Disadvantages                                                     |
|---------------------------------------------------------------------------|------------------------|-------------------------------------------------------------------------------------------------------------------------|-------------------------------------------------------------------|
| This work                                                                 | 23.2 nM                | Visual and rapid detection, simple synthesis, high selectivity and water solubility, easy to fabricate into test papers | Visual detection with UV lamp                                     |
| Zwitterionic squaraine dye <sup>1</sup>                                   | 70 nM                  | Colorimetric detection                                                                                                  | Complicated synthesis and poor water solubility                   |
| BODIPY derivative <sup>2</sup>                                            | 0.65 ppb (2.84 nM)     | Turn on response                                                                                                        | Complicated synthesis and poor water solubility                   |
| Triphenylene derivatives <sup>3</sup>                                     | 35 nM                  | Rapid response, easy to fabricate into test papers                                                                      | Poor selectivity, complicated synthesis and poor water solubility |
| 1,8-Naphthyridine <sup>4</sup>                                            | 4.16 $\mu$ M           | Ease of preparation                                                                                                     | Poor sensitivity                                                  |
| Anthracene-functionalized fluorescent tris-imidazolium salts <sup>5</sup> | 354 ppb (1.54 $\mu$ M) | Good selectivity in both organic and aqueous media                                                                      | Complicated synthesis                                             |
| Amine-functionalized $\alpha$ -cyanostilbene derivatives <sup>6</sup>     | 1.96 $\mu$ M           | Good sensitivity and selectivity                                                                                        | Complicated synthesis and the use of organic solvent              |
| Anthracene Derivatives <sup>7</sup>                                       | 500 ppb (2.13 $\mu$ M) | Visual detection, good selectivity                                                                                      | Complicated synthesis and the use of organic solvent              |
| Bispyrene fluorophore <sup>8</sup>                                        | 1 $\mu$ M              | Good water solubility                                                                                                   | Poor selectivity                                                  |
| Pyrene based copper complex array <sup>9</sup>                            | 0.14 $\mu$ M           | Rapid response                                                                                                          | Poor water                                                        |

|                                                         |                           |                       |                            |
|---------------------------------------------------------|---------------------------|-----------------------|----------------------------|
|                                                         |                           |                       | solubility and selectivity |
| Cationic iridium(III) complex <sup>10</sup>             | 0.5 ppm<br>(2.13 $\mu$ M) | Good water solubility | Poor sensitivity           |
| Cationic conjugated Polymer Nanoparticles <sup>11</sup> | 30.9 pM                   | High sensitivity      | Complicated preparation    |

References:

1. Y. Xu, B. Li, W. Li, J. Zhao, S. Sun and Y. Pang, *Chem. Commun.*, 2013, **49**, 4764.
2. Y. Erande, S. Chemate, A. More and N. Sekar, *RSC Adv.*, 2015, **5**, 89482.
3. H. Arora, V. Bhalla and M. Kumar, *RSC Adv.*, 2015, **5**, 32637.
4. M. K. Chahal and M. Sankar, *Anal. Methods*, 2015, **7**, 10272.
5. B. Roy, A. K. Bar, B. Gole and P. S. Mukherjee, *J. Org. Chem.*, 2013, **78**, 1306.
6. A. Ding, L. Yang, Y. Zhang, G. Zhang, L. Kong, X. Zhang, Y. Tian, X. Tao and J. Yang, *Chem. – Eur. J.*, 2014, **20**, 12215.
7. D. C. Santra, M. K. Bera, P. K. Sukul and S. Malik, *Chem. – Eur. J.*, 2016, **22**, 2012.
8. L. Ding, Y. Bai, Y. Cao, G. Ren, G. J. Blanchard and Y. Fang, *Langmuir*, 2014, **30**, 7645.
9. R. Pandey, L. Reddy, S. Ishihara, A. Dhir and V. Krishnan, *RSC Adv.*, 2013, **3**, 21365.
10. X. G. Hou, Y. Wu, H. T. Cao, H. Z. Sun, H. B. Li, G. G. Shan and Z. M. Su, *Chem. Commun.*, 2014, **50**, 6031.
11. A. H. Malik, S. Hussain, A. Kalita and P. K. Iyer, *ACS Appl. Mater. Interfaces*, 2015, **7**, 26968.
